# Supplementary material
Source: HighWire-hosted journal article supplement (http://bmjleader.bmj.com/highwire/filestream/2473/field_highwire_adjunct_files/1/leader-2021-000566supp002_data_supplement.pdf)
Supplement: leader-2021-000566supp002_data_supplement.pdf [file leader-2021-000566supp002_data_supplement.pdf]

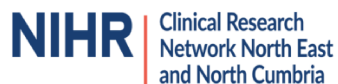

## Factors Affecting Recruitment to the RECOVERY study during the COVID-19 Pandemic.

### Invitation and brief summary:

We would like to invite you to take part in a research study. Please read this information leaflet which tells you why the research is being done and what you will be asked to do. You are welcome to ask us about anything that is unclear or for further information.

The project is looking at what factors may have affected recruitment to the RECOVERY study during the COVID-19 pandemic. We are doing this by interviewing people who were involved in either the set-up and running of the study or the recruitment of participants. The RECOVERY study was an Urgent Public Health Study where strategies were put in place to speed up approval, study processes and recruitment. We would like to find out if these worked and what else, if anything could be done to aid set-up, running and recruitment, should the situation arise again.

You have been identified as someone who was involved, directly or indirectly, in the set-up, running or recruitment of participants to the RECOVERY Study. We are hoping to interview about 15 people at each research site.

### What would taking part involve?

You will be contacted by one of the research team who will arrange a convenient time for you to take part in an interview. During the interview you will be asked to talk about your experiences of the RECOVERY study during the COVID-19 pandemic. The interview will most probably take place over a video call or a telephone call. It will last about 30 minutes. The interview will be recorded on a digital recorder.

### Do I have to take part?

No, you don't. It is up to you decide whether you want to take part or not. Even if you decide at first to join in, but change your mind, you can leave the study at any time. You can stop being part of the study at any time, without giving a reason, but we will keep information about you that we already have. Once your interview has been transcribed and anonymised it becomes impossible to remove it from the study.

### What are the possible benefits?

There are no real benefits to you personally. Hopefully we will be able to make some suggestions to researchers and organisation involved in research to aid set-up and recruitment of urgent studies in the future.

### What are the possible disadvantages and risks of taking part?

We do not feel there are any disadvantages to taking part. There is a very small risk that during your interview you tell us about poor practice. Should this happen we will need to inform the Trust through their safeguarding procedures.

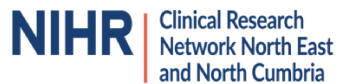

## How will my information be kept confidential?

All information you provide we will be stored securely and kept strictly confidential. People who do not need to know who you are will not be able to see your name or contact details. Your data will have a code number instead. We will keep all information about you safe and secure. Your interview will be transcribed by the research team and all the material that may identify you, colleagues or the trust anonymised. This means it will be replaced by a code. The code, and what it represents will only be seen by the research team.

In any reports or publications that may come from the study you, your colleagues or the Trust will not be identifiable.

## Who is running the study?

The research is being run by the North East and North Cumbria Clinical Research Network. It is registered by Newcastle Upon Tyne Hospitals National Health Service Foundation Trust on the Clinical Effectiveness Register.

## What happens now?

If you decide to take part in the project please contact xxxx on xxxx

Or xxxx

She will arrange a time for your interview and send you a consent form. You will need to sign the consent form before the interview. You can return it to xxxx and your consent will be recorded before the interview.

If you have any questions please contact xxxx on xxxx

Or xxxx

If you want to find out more about how your information will be used please see:

[www.hra.nhs.uk/patientdataandresearch](http://www.hra.nhs.uk/patientdataandresearch)

If you have any complaints about the project please contact the project Chief Investigator: xxxx

Alternative you can contact the Patient Advisory and Liaison Service at Newcastle Upon Tyne Hospitals National Health Service Foundation Trust:

Freephone: 0800 0320202      Text/SMS: 07815500015

Email: [northoftynepals@nhct.nhs.uk](mailto:northoftynepals@nhct.nhs.uk)      Post: Freepost PALS: RLTC-SGHH-EGXJ
